# Supplementary material for: Rare but specific: 5-bp composite motifs define SMAD binding in BMP signaling
Source: Springer Nature journal article supplement (doi:10.1186/s12915-025-02183-1), 2025-03-13
Supplement: MOESM1 [file 12915_2025_2183_MOESM1_ESM.pdf]

**Rare but specific:**  
**5-bp Composite Motifs Define SMAD Binding in BMP Signaling**

Jerome Jatzlau<sup>1,2</sup>, Sophie-Nhi Do<sup>1</sup>, Rebeca A. Mees<sup>2</sup>, Paul-Lennard Mendez<sup>1</sup>, Rameez Jabeer Khan<sup>2</sup>, Lukas Maas<sup>1</sup>, Lidia Ruiz<sup>2</sup>, Pau Martin-Malpartida<sup>2</sup>, Maria J. Macias<sup>2,3,\*</sup>, Petra Knaus<sup>1,\*</sup>

**Supplementary Figures**

**Fig. S1. SMAD-MH1 purity control and experimental set-up**

**Fig. S2. BRE<sub>2</sub>-Luc and CAGA<sub>12</sub>-Luc define experimental conditions for selective comparison of BMP6 and TGFβ1**

**Fig. S3. BMP6 dose-response curves of SMAD composite motif reporters**

**Fig. S4. Composite motif spacers below 5 bp do not inhibit SMAD1-MH1 double binding**

**Fig. S5. BMP-responsive SMAD homocomposite motif reporters are unresponsive to TGFβ1**

**Fig. S6. BMP-responsive SMAD heterocomposite motif reporters are unresponsive to TGFβ1**

**Fig. S7. BMP-specificity of SMAD composite motif reporters is maintained in U2OS cells**

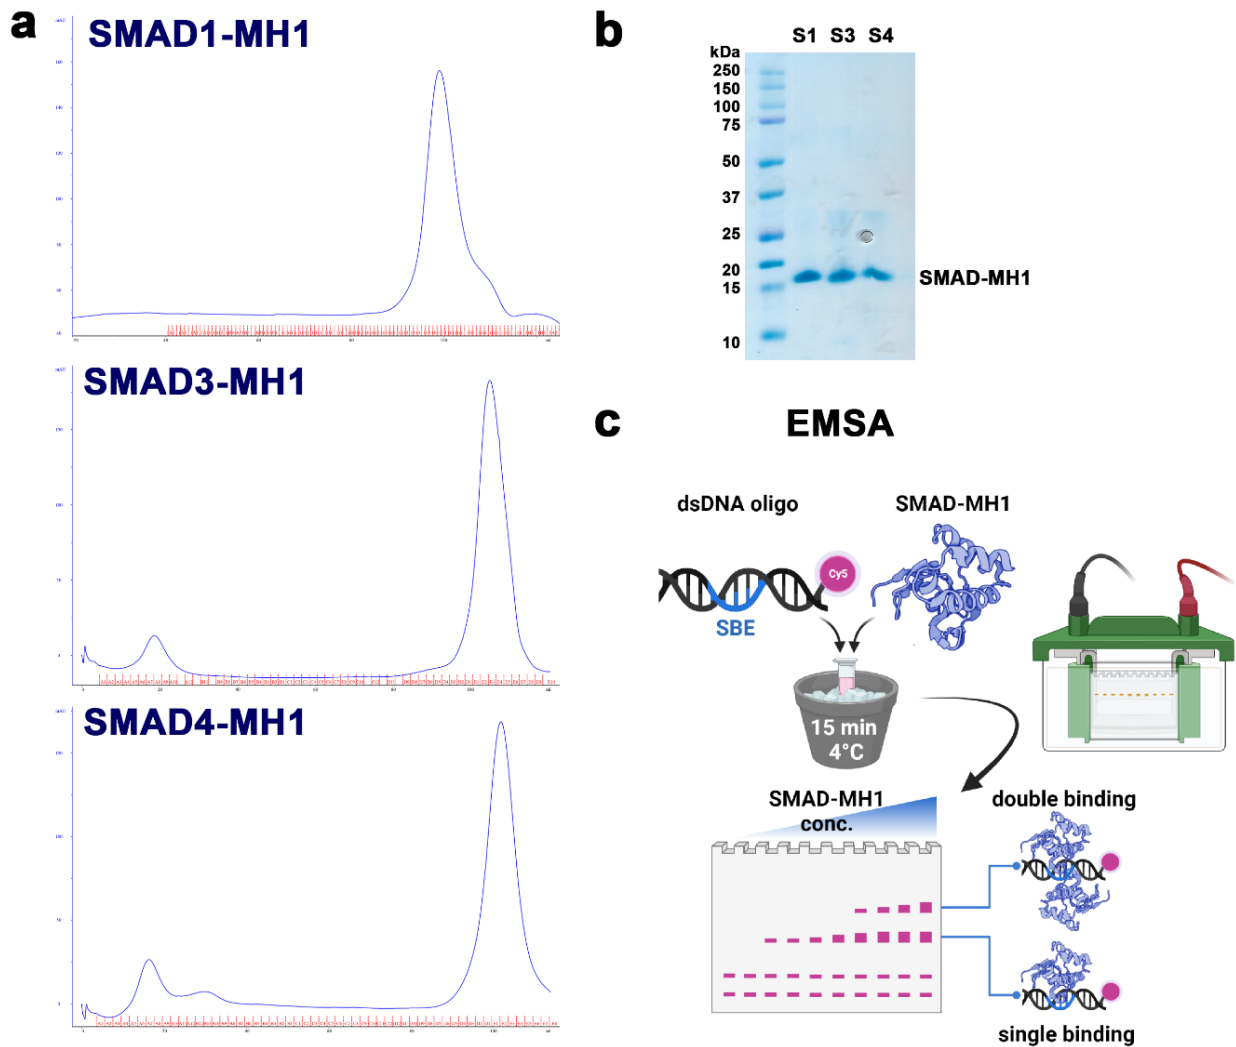

**Fig. S1. SMAD-MH1 purity control and experimental set-up:** *a*, SEC traces of purified SMAD-MH1 domains. *b*, Coomassie staining of purified SMAD-MH1 domains. *c*, Increasing concentration of SMAD1/3/4-MH1 domains were incubated with Cy5-dsDNA oligos containing known SMAD-binding element (SBE)s and analyzed for binding using Electro Mobility Shift Assay. Single or double binding of SMAD-MH1 is detected by weight shift of Cy5-dsDNA signal.

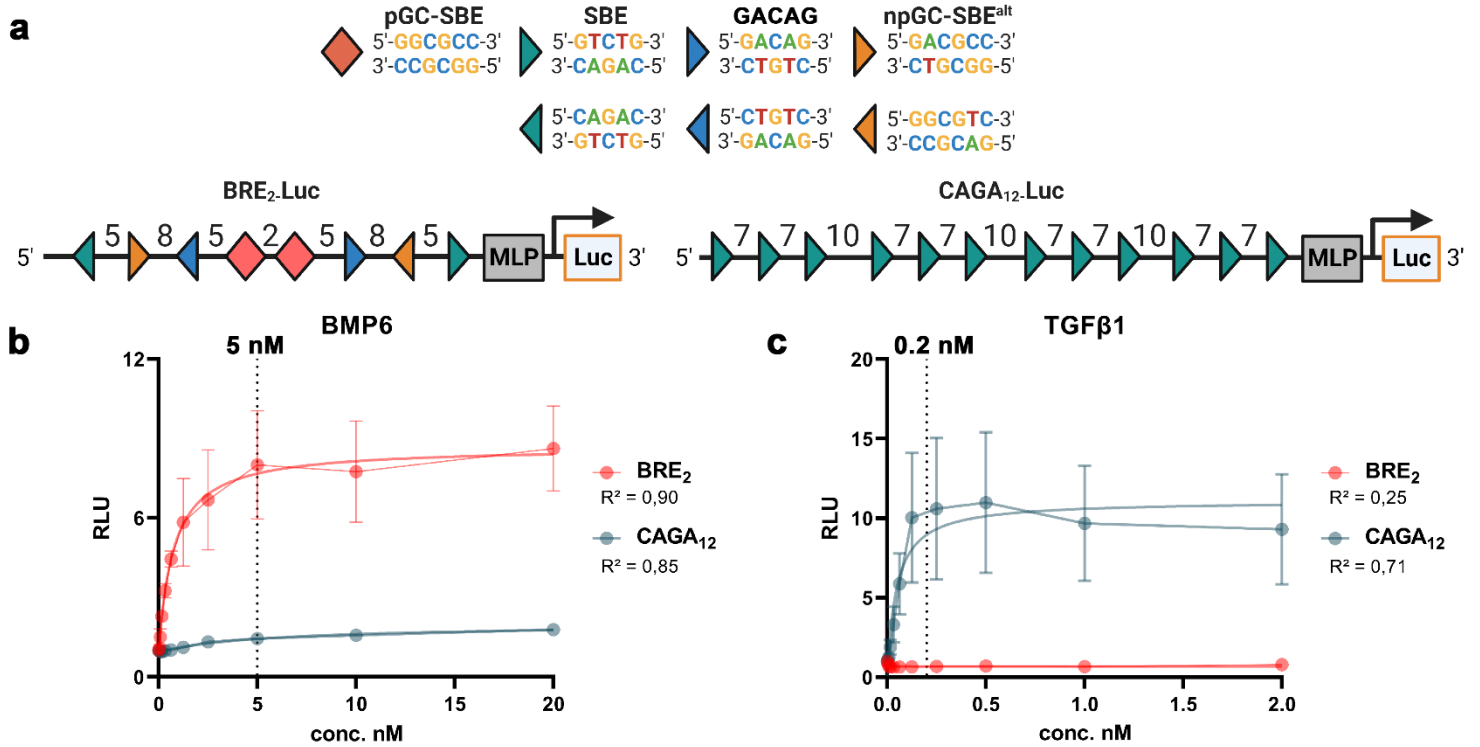

**Fig. S2. BRE<sub>2</sub>-Luc and CAGA<sub>12</sub>-Luc define experimental conditions for selective comparison of BMP6 and TGFβ1:** *a*, SMAD motifs in the two luciferase reporters are indicated. *b*, BRE<sub>2</sub>-Luc or CAGA<sub>12</sub>-Luc was transfected together with TK-renilla luciferase into HEK293t cells, cells were then starved and stimulated with BMP6 (0.03 - 20 nM) or TGFβ1 (0.003 - 2 nM) for 24 h before analysis using a microplate reader. *b-c*, Data are shown as mean fold induction in relative luciferase units (RLU) ±SD (n=3 independent experiments). 5 nM BMP6 and 0.2 nM TGFβ1 were selected for all consecutive experiments as they gave a high response close to saturation of the signal.

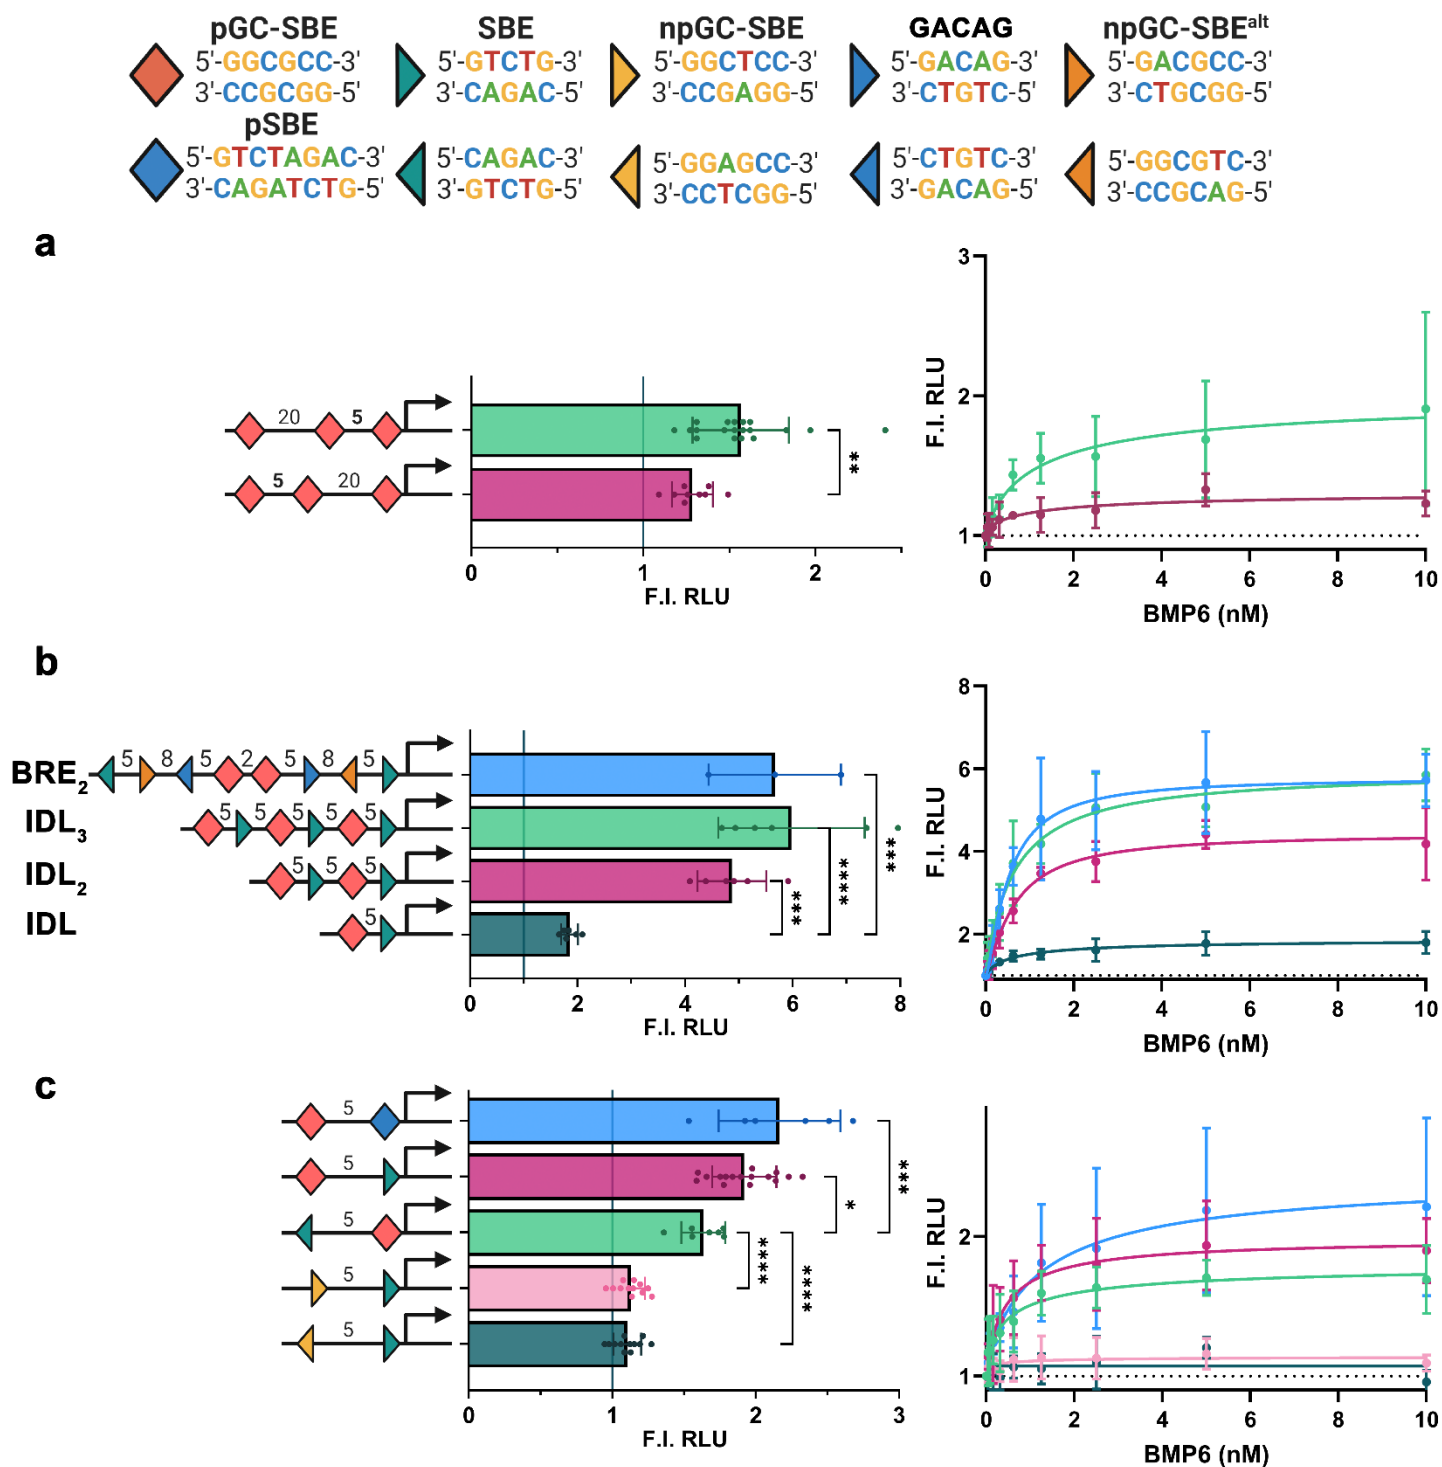

**Fig. S3. BMP6 dose-response curves of SMAD composite motif reporters : a-c,** HEK293t cells were co-transfected with SBE-firefly-Luc constructs and TK-renilla luciferase, starved and stimulated with BMP6 for 24 hrs before analysis using a microplate reader. Bar charts represent response to 5 nM BMP6 (left) and dose curves represent the response to 0.04 nM to 10 nM BMP6 (right). **a**, Dual luciferase reporter assay displaying decreased BMP6-responsiveness, if 5bp-spaced pGC-SBE

*homocomposite motif is 20+6 bp further away from the MLP. **b**, Dual luciferase reporter assay displaying elevated BMP6-responsiveness towards multiplied (2-3x) pGC-SBE/SBE heterocomposite motifs. **c**, Dose response comparison of heterocomposite motifs from Fig.3. **a-c**, Data are shown as mean fold induction to unstimulated cells (grey line) in relative luciferase units (RLU)  $\pm$ SD (5nM BMP6 n=3–19; dose curves n=3 independent experiments). Statistical significance was calculated between samples using one-way ANOVA and Tukey's post-hoc test.*

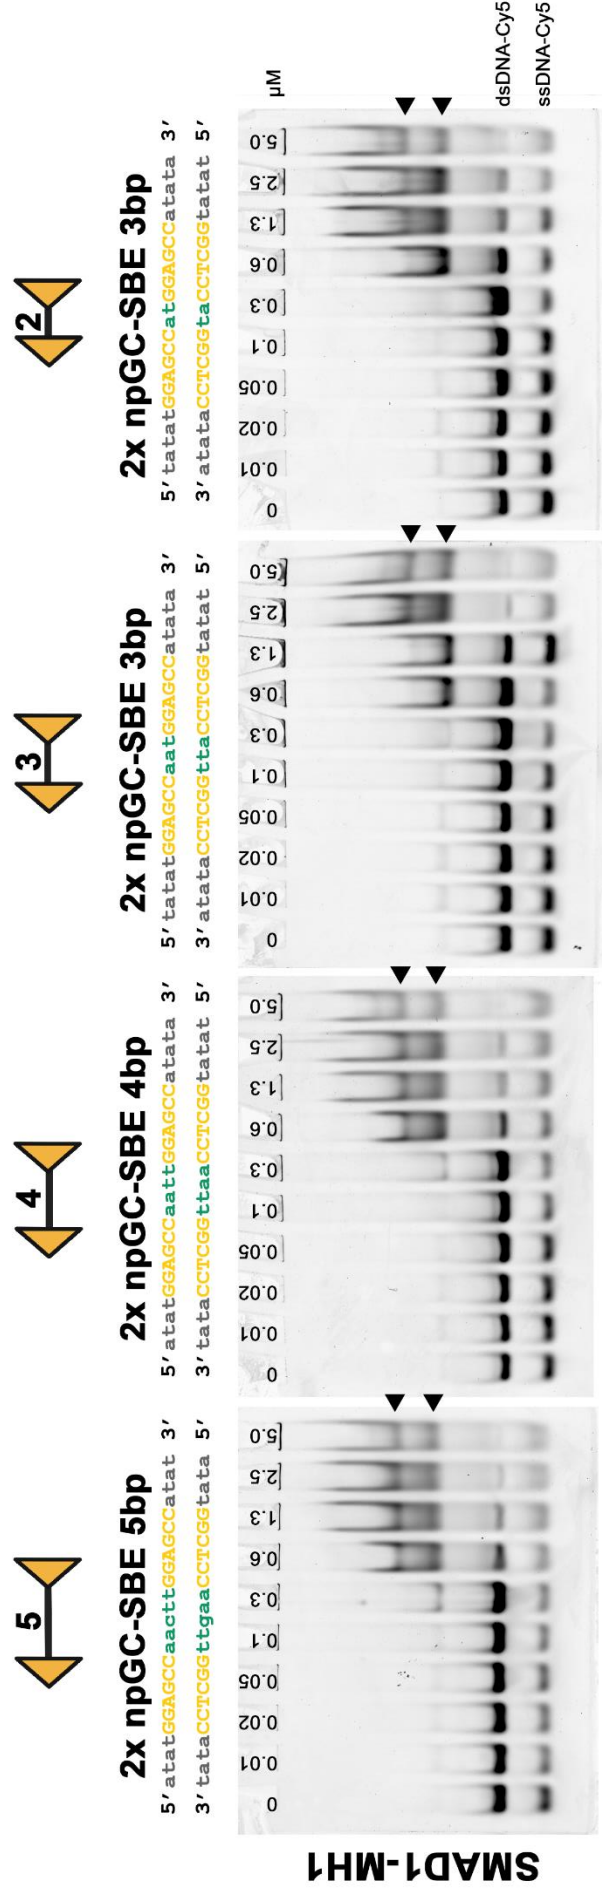

**Fig. S4. Composite motif spacers below 5 bp do not inhibit SMAD1-MH1 double binding: EMSA experiments were performed testing the binding of human SMAD1-MH1 domains to differently spaced (2-5 bp) npGC-SBE homocomposite motifs. Protein concentrations ( $\mu$ M) are shown on top of the EMSA. Abbreviations for the DNA oligonucleotides and dsDNA sequence are shown above. Single and double SMAD-MH1 binding to dsDNA is indicated with black triangles.**

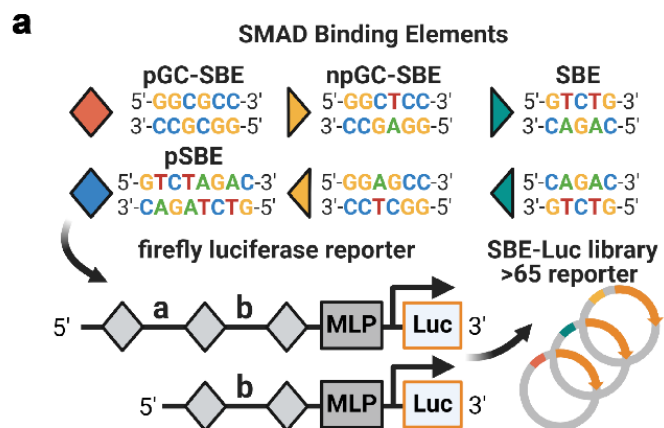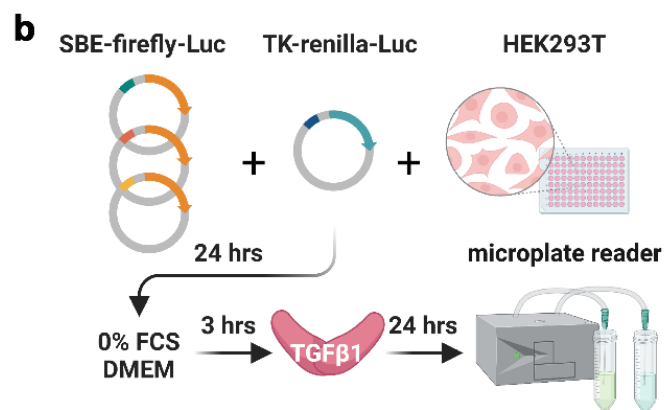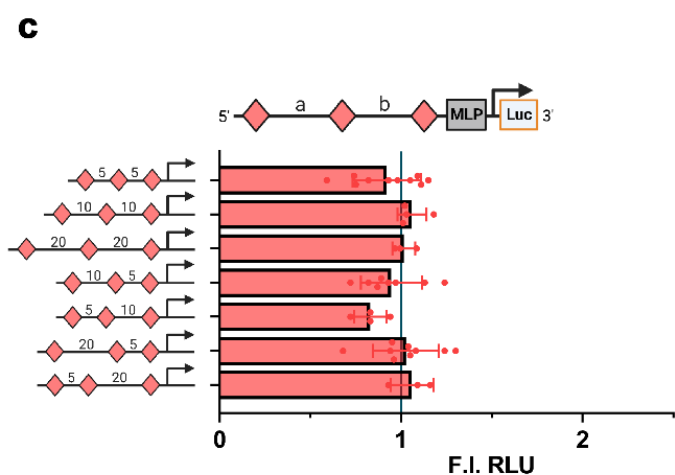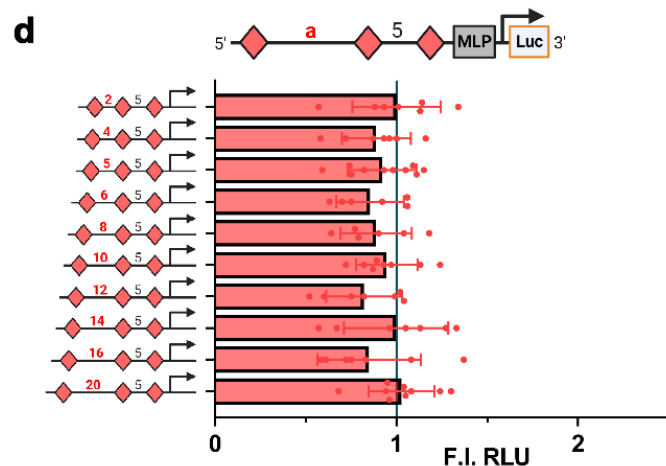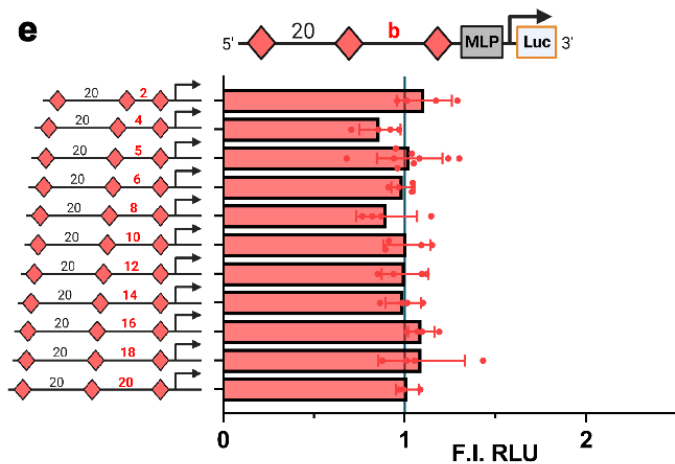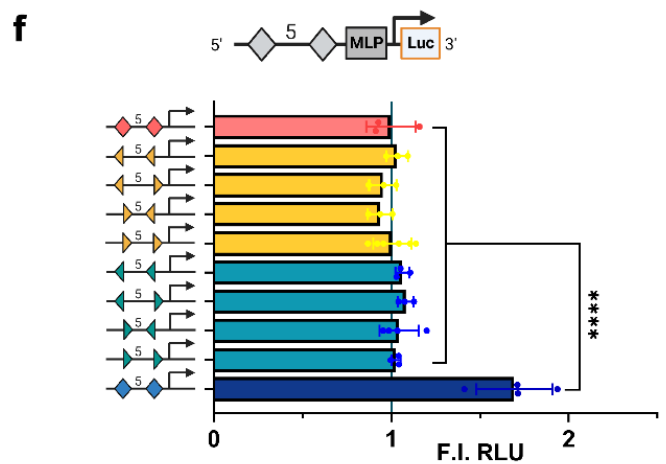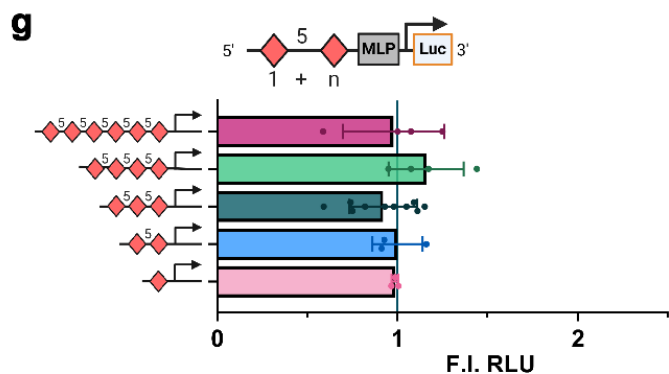

**Fig. S5. BMP-responsive SMAD homocomposite motif reporters are unresponsive to TGF $\beta$ 1:** **a**, A library of synthetic firefly luciferase constructs was cloned with 1 to 6 SMAD motifs positioned 10 bp before a minimal promotor (MLP) with varying spacer length for pGC-SBEs and varying orientation for npGC-SBE and SBE motifs. **b**, HEK293t cells were co-transfected with SBE-firefly-Luc constructs and TK-renilla luciferase, starved and stimulated with TGF $\beta$ 1 (0.2 nM) for 24 hrs before analysis using a microplate reader. **c-g**, Dual luciferase reporter assay displaying no TGF $\beta$ 1-responsiveness towards constructs with differently spaced SMAD homocomposite motifs, except to two 5-bp spaced pSBE motifs. **c-g**, Data are shown as mean fold induction to unstimulated cells (grey line) in relative luciferase units (RLU)  $\pm$ SD (n=3–10 independent experiments). Statistical significance was calculated between samples using one-way ANOVA and Tukey's post-hoc test.



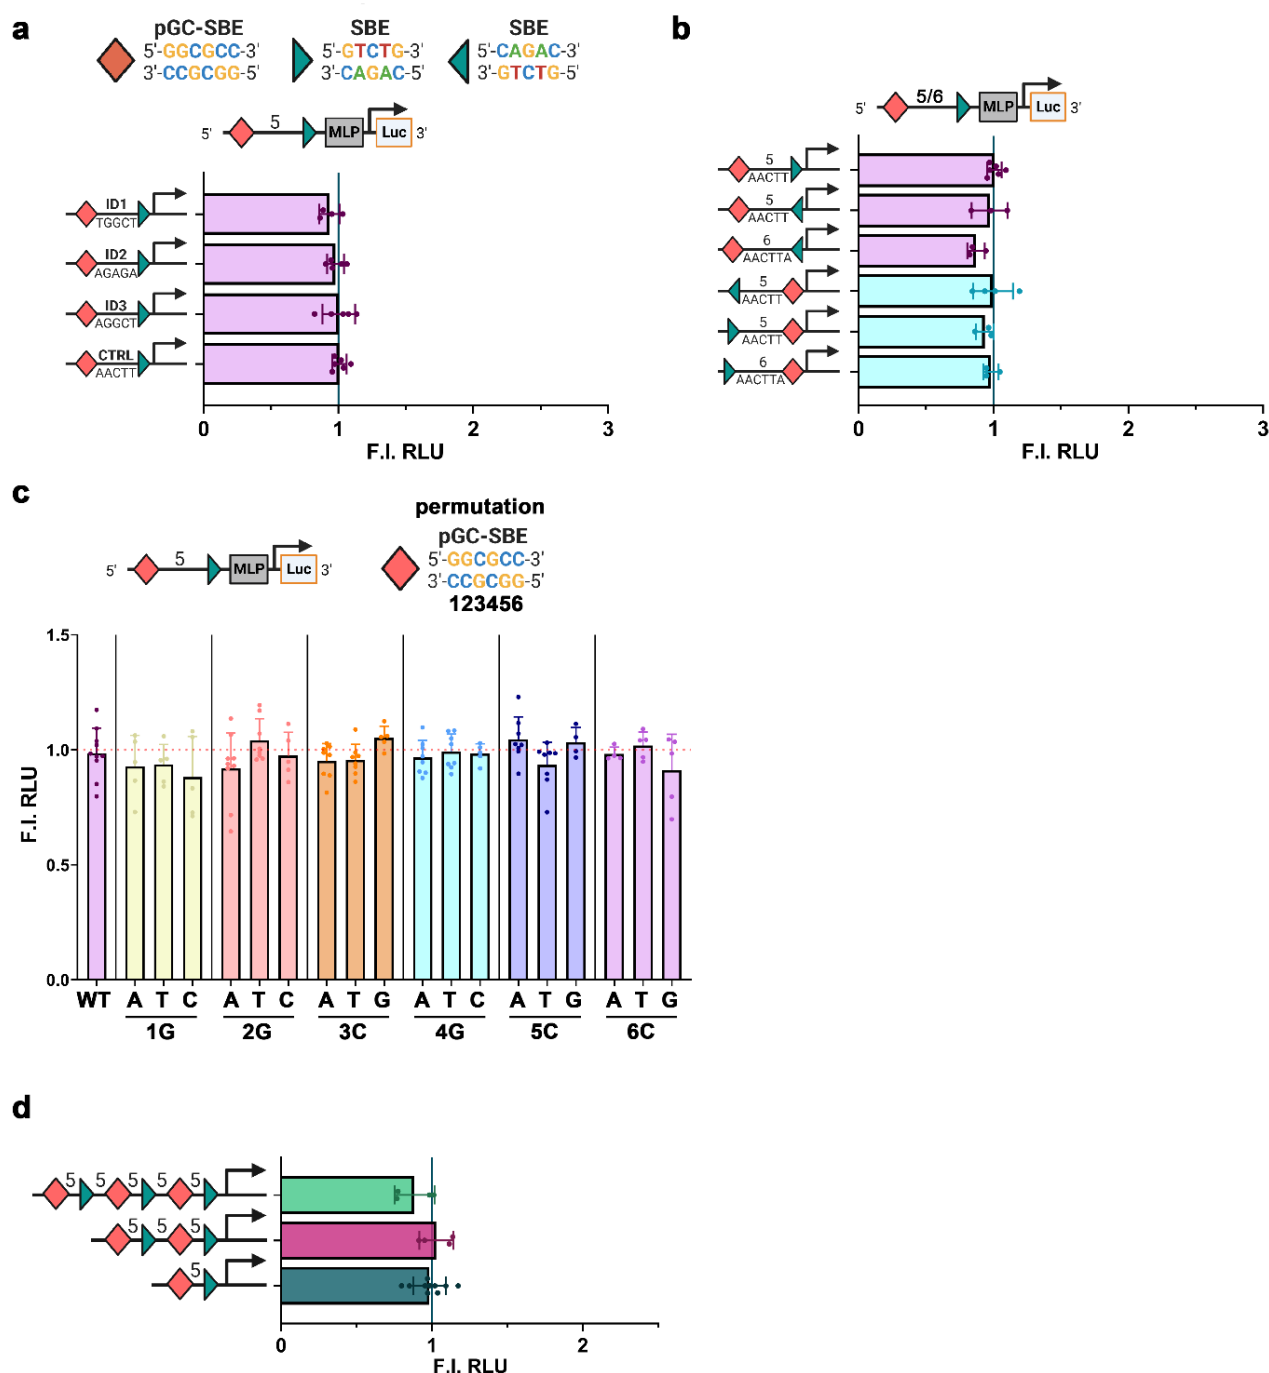

**Fig. S6. BMP-responsive SMAD heterocomposite motif reporters are unresponsive to TGFβ1:** **a-c**, Dual luciferase reporter assay displaying no TGFβ1-responsiveness (0.2 nM TGFβ1, 24 hrs) towards constructs with differently spaced (**a**), oriented (**b**), or permuted (**c**) or multiplied (**d**) SMAD heterocomposite motifs. Data are shown as mean fold induction to unstimulated cells (line) in relative luciferase units (RLU)  $\pm$ SD ( $n=3-10$  independent experiments). Statistical significance was calculated between samples using one-way ANOVA and Tukey's post-hoc test (**a-b,d**) and between samples (**c**) or relative to WT ctrl (**c**) using one-way ANOVA and Šídák's or Dunnett's multiple comparisons test.

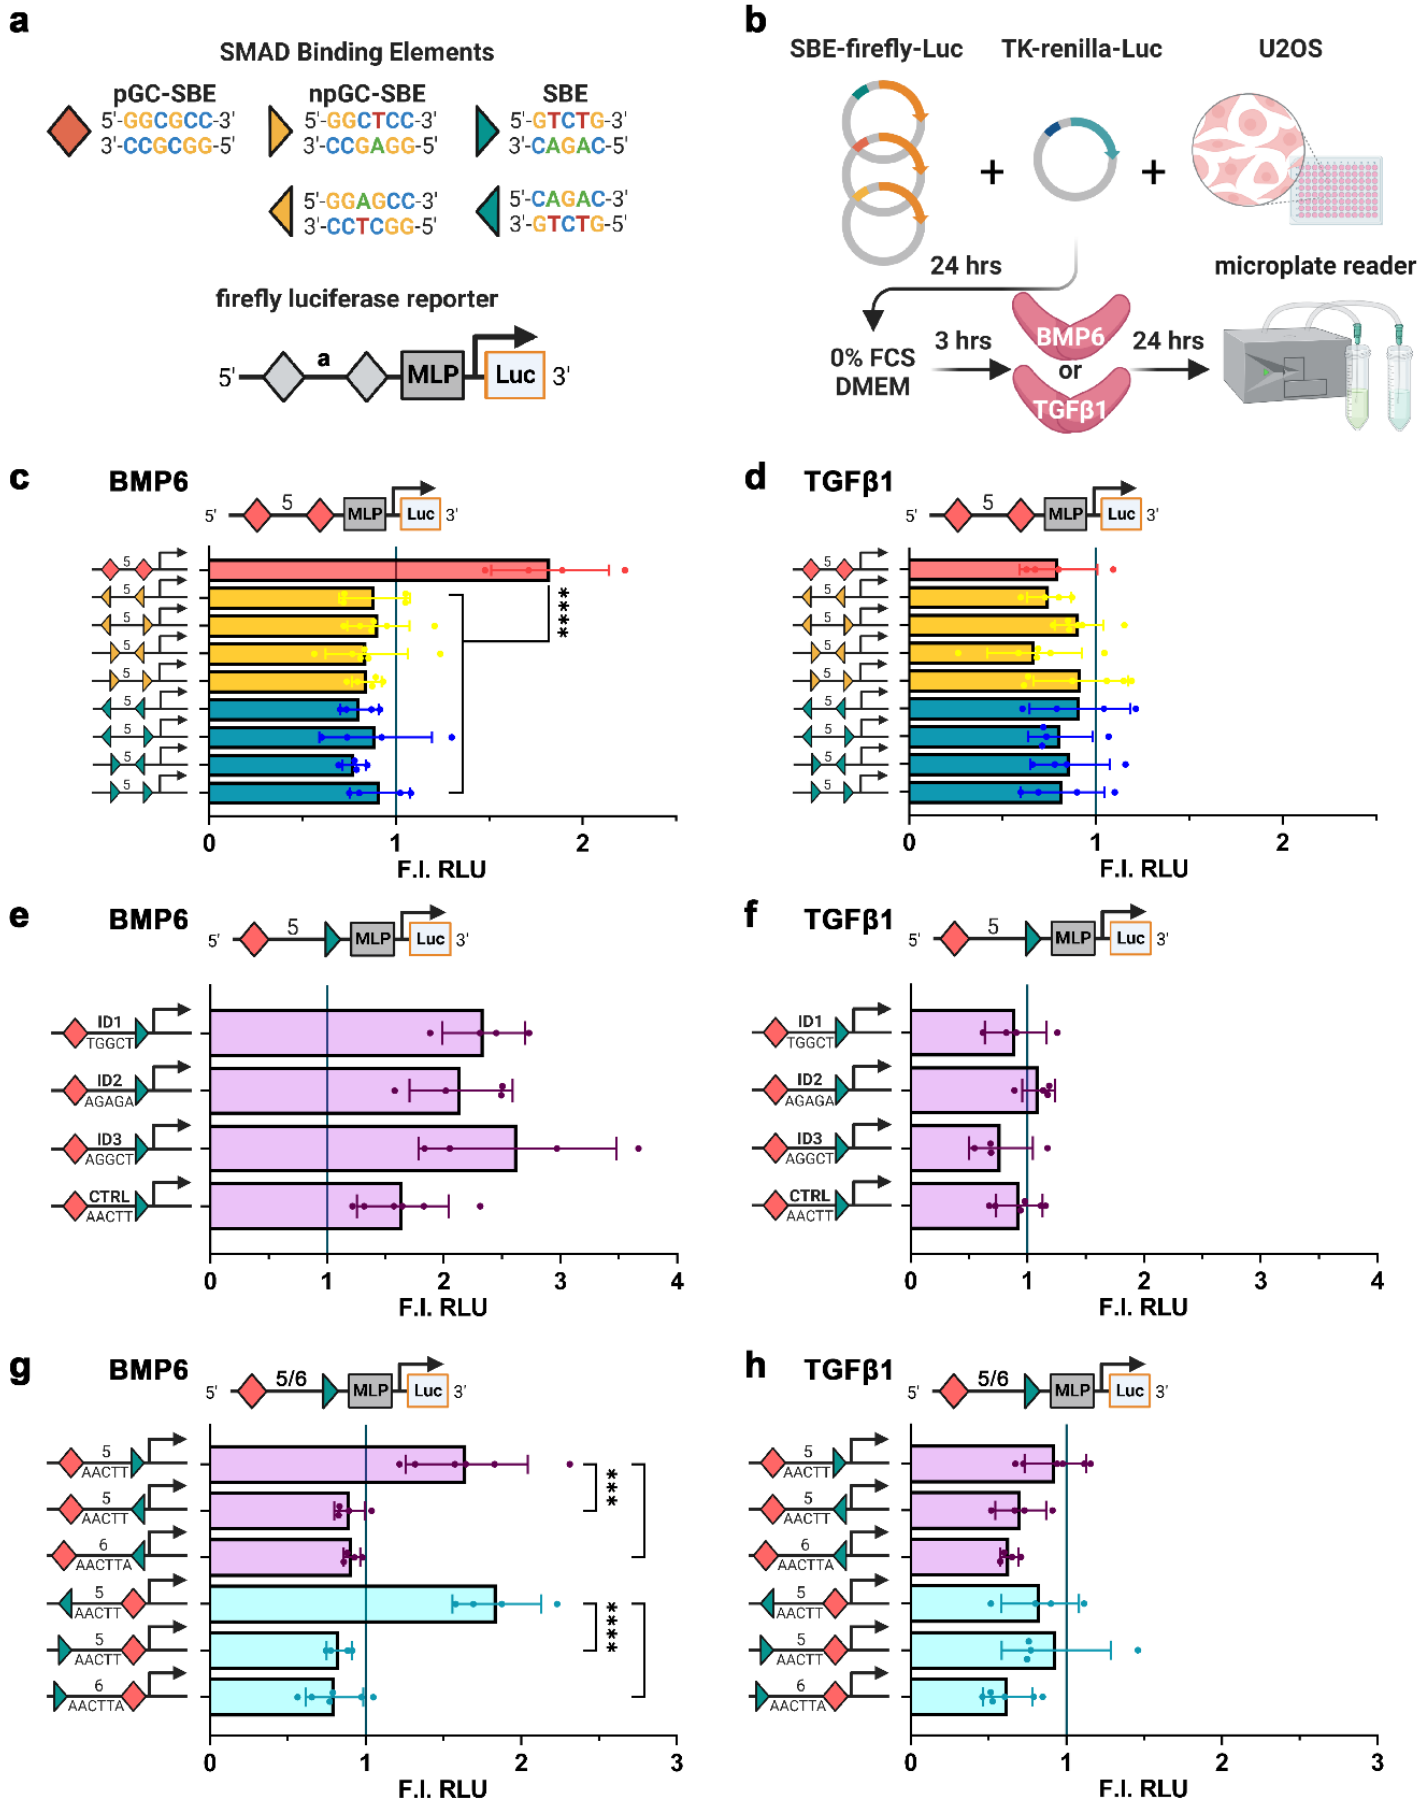

**Fig. S7. BMP-specificity of SMAD composite motif reporters is maintained in U2OS cells:** **a**, A library of synthetic firefly luciferase construct was cloned with 2 SMAD motifs positioned before a minimal promotor (MLP) with varying spacer length and orientation of SMAD motifs. **b**, U2OS cells were co-transfected with SBE-firefly-Luc constructs and TK-renilla luciferase, starved, and stimulated with BMP6 (5 nM) or TGF $\beta$ 1 (0.2 nM) for 24 hrs before analysis using a microplate reader. **c-h**, Dual luciferase reporter assay displaying BMP6-responsiveness towards 5-bp spaced SMAD homo- and heterocomposite motif constructs. Data are shown as mean fold induction to unstimulated cells in relative luciferase units (RLU)  $\pm$ SD (n=4–6 independent experiments). Statistical significance was calculated between samples using one-way ANOVA and Tukey's post-hoc test.
